# Supplementary figures and images for: Z-DNA enhances immunotherapy by triggering death of inflammatory cancer-associated fibroblasts
Source: PubMed Central journal article supplement — J Immunother Cancer. 2022 Nov 30;10(11):e005704. doi: 10.1136/jitc-2022-005704 (PMC9716847; doi:10.1136/jitc-2022-005704), 2022-11-30

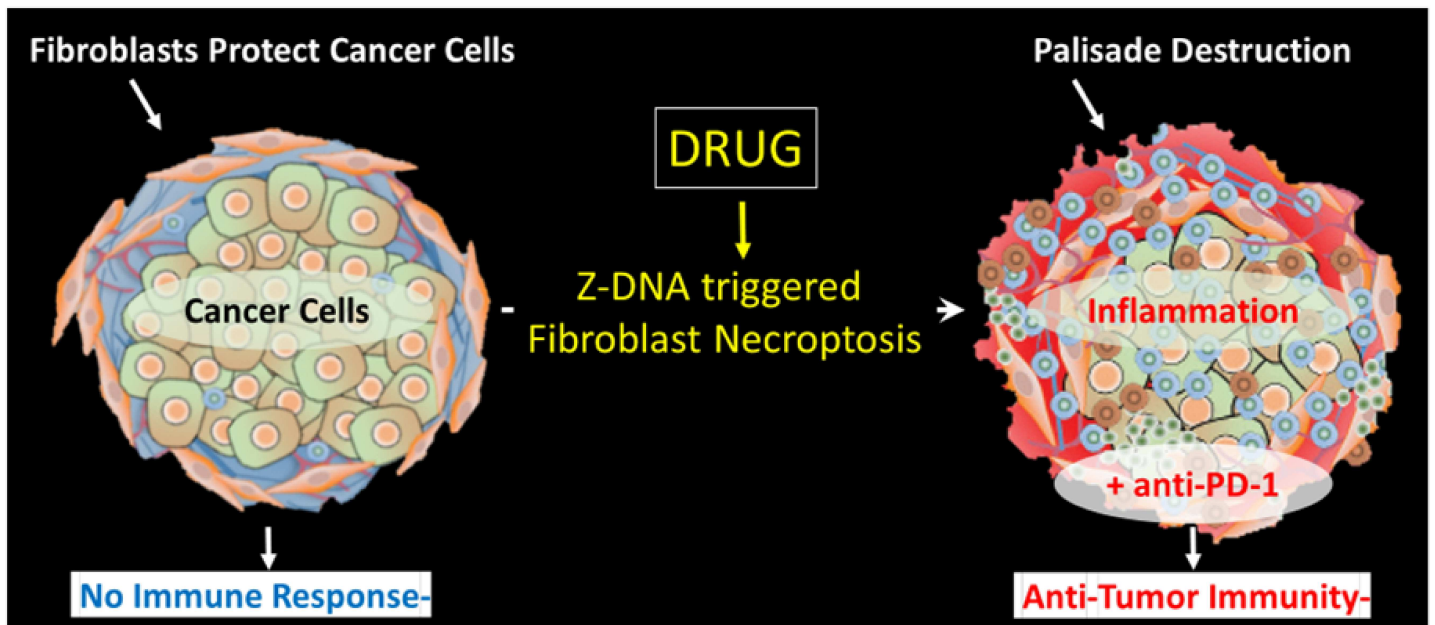

Supplement: jitc-2022-005704supp001.pdf [file jitc-2022-005704supp001.pdf]
